# Supplementary material
Source: PubMed Central journal article supplement (PMC6536360)
Supplement: NIHMS1525712-supplement-1.pdf [file NIHMS1525712-supplement-1.pdf]

Supplemental Table. Estimated associations between anotia/microtia and selected maternal, paternal, and pregnancy-related characteristics by laterality and infant sex, National Birth Defects Prevention Study, 1997-2011

|                                    | aOR (95% CI) by laterality |                     | aOR (95% CI) by infant sex |                   |
|------------------------------------|----------------------------|---------------------|----------------------------|-------------------|
|                                    | Unilateral (n=608)         | Bilateral (n=88)    | Male (n=400)               | Female (n=299)    |
| <i>Pregnancy characteristics</i>   |                            |                     |                            |                   |
| Infant sex                         |                            |                     |                            |                   |
| Female                             | 1                          | 1                   |                            |                   |
| Male                               | 1.30 (1.10, 1.53)          | 1.17 (0.78, 1.78)   | --                         | --                |
| Plurality                          |                            |                     |                            |                   |
| Singleton                          | 1                          | 1                   | 1                          | 1                 |
| Multifetal gestation               | 1.87 (1.29, 2.71)          | 0.38 (0.05, 2.71)   | 1.27 (0.73, 2.20)          | 2.22 (1.36, 3.62) |
| Gestational age at delivery        |                            |                     |                            |                   |
| <32 weeks, very preterm            | 2.78 (1.73, 4.47)          | 10.91 (5.31, 22.43) | 2.97 (1.73, 5.12)          | 4.64 (2.52, 8.54) |
| 32-36 weeks, preterm               | 2.18 (1.73, 2.74)          | 5.05 (3.14, 8.11)   | 1.91 (1.42, 2.59)          | 3.26 (2.42, 4.38) |
| ≥37 weeks, term                    | 1                          | 1                   | 1                          | 1                 |
| <i>Maternal characteristics</i>    |                            |                     |                            |                   |
| Age at delivery <sup>a</sup>       |                            |                     |                            |                   |
| <25 years                          | 0.96 (0.79, 1.16)          | 0.75 (0.46, 1.23)   | 0.94 (0.73, 1.19)          | 0.93 (0.71, 1.22) |
| 25-34 years                        | 1                          | 1                   | 1                          | 1                 |
| >35 years                          | 1.23 (0.96, 1.57)          | 1.02 (0.54, 1.92)   | 1.35 (1.01, 1.81)          | 1.02 (0.70, 1.48) |
| Race/ethnicity <sup>b</sup>        |                            |                     |                            |                   |
| White, non-Hispanic                | 1                          | 1                   | 1                          | 1                 |
| Black, non-Hispanic                | 0.51 (0.32, 0.81)          | 0.89 (0.37, 2.12)   | 0.36 (0.19, 0.69)          | 0.87 (0.51, 1.49) |
| Hispanic                           | 3.29 (2.65, 4.08)          | 2.65 (1.55, 4.53)   | 2.96 (2.26, 3.87)          | 3.52 (2.58, 4.79) |
| Other                              | 1.80 (1.28, 2.53)          | 1.71 (0.74, 3.98)   | 1.89 (1.26, 2.84)          | 1.64 (0.98, 2.73) |
| Birthplace <sup>c</sup>            |                            |                     |                            |                   |
| US                                 | 1                          | 1                   | 1                          | 1                 |
| non-US                             | 1.33 (1.08, 1.63)          | 1.03 (0.60, 1.75)   | 1.29 (1.00, 1.68)          | 1.29 (0.96, 1.73) |
| Education level <sup>c</sup>       |                            |                     |                            |                   |
| <high school                       | 1.07 (0.85, 1.36)          | 0.95 (0.77, 1.18)   | 1.10 (0.82, 1.48)          | 1.18 (0.85, 1.65) |
| high school                        | 1                          | 1                   | 1                          | 1                 |
| >high school                       | 0.95 (0.77, 1.18)          | 0.95 (0.77, 1.18)   | 0.99 (0.76, 1.29)          | 0.90 (0.66, 1.22) |
| Number of prior live births        |                            |                     |                            |                   |
| 0                                  | 1                          | 1                   | 1                          | 1                 |
| 1                                  | 1.11 (0.91, 1.35)          | 0.88 (0.53, 1.45)   | 1.17 (0.92, 1.50)          | 0.96 (0.72, 1.28) |
| 2                                  | 1.04 (0.81, 1.32)          | 0.76 (0.41, 1.44)   | 0.99 (0.72, 1.34)          | 1.03 (0.74, 1.44) |
| ≥3                                 | 1.17 (0.89, 1.53)          | 1.14 (0.60, 2.16)   | 1.20 (0.86, 1.67)          | 1.13 (0.77, 1.67) |
| Body mass index, kg/m <sup>2</sup> |                            |                     |                            |                   |
| <18.5, underweight                 | 1.06 (0.71, 1.57)          | 0.24 (0.03, 1.75)   | 0.82 (0.48, 1.40)          | 1.15 (0.65, 2.02) |
| 18.5-25, normal weight             | 1                          | 1                   | 1                          | 1                 |
| 25-30, overweight                  | 1.09 (0.88, 1.36)          | 1.24 (0.74, 2.08)   | 1.06 (0.81, 1.38)          | 1.21 (0.89, 1.65) |

|                                    |                    |                      |                    |                     |
|------------------------------------|--------------------|----------------------|--------------------|---------------------|
| >30, obese                         | 1.34 (1.08, 1.67)  | 1.11 (0.62, 1.98)    | 1.33 (1.01, 1.74)  | 1.28 (0.93, 1.77)   |
| History of diabetes <sup>c</sup>   |                    |                      |                    |                     |
| None                               | 1                  | 1                    | 1                  | 1                   |
| Type I                             | 5.74 (2.74, 12.00) | 47.76 (21.71, 105.0) | 7.00 (2.91, 16.85) | 13.61 (6.07, 30.55) |
| Type II                            | 3.03 (1.45, 6.34)  | 19.32 (7.88, 47.38)  | 7.32 (3.27, 16.42) | 2.89 (1.08, 7.75)   |
| Gestational                        | 1.12 (0.84, 1.50)  | 2.68 (1.49, 4.83)    | 1.06 (0.72, 1.54)  | 1.56 (1.07, 2.26)   |
| History of asthma <sup>c</sup>     |                    |                      |                    |                     |
| No                                 | 1                  |                      | 1                  |                     |
| Yes                                | 1.11 (0.40, 3.08)  | NC                   | 1.85 (0.65, 5.27)  | NC                  |
| Folic acid supplementatior         |                    |                      |                    |                     |
| No use                             | 1                  | 1                    | 1                  | 1                   |
| Some use, but not daily            | 0.82 (0.67, 0.99)  | 0.76 (0.47, 1.23)    | 0.84 (0.66, 1.07)  | 0.77 (0.59, 1.02)   |
| Daily use                          | 0.61 (0.47, 0.79)  | 0.44 (0.22, 0.89)    | 0.84 (0.66, 1.07)  | 0.60 (0.41, 0.88)   |
| Alcohol use <sup>c</sup>           |                    |                      |                    |                     |
| None                               | 1                  | 1                    | 1                  | 1                   |
| Drinking, but not binge            | 0.97 (0.78, 1.20)  | 0.97 (0.56, 1.68)    | 1.08 (0.83, 1.39)  | 0.82 (0.59, 1.13)   |
| Binge drinking                     | 0.95 (0.72, 1.25)  | 1.84 (1.06, 3.21)    | 1.16 (0.84, 1.61)  | 1.08 (0.83, 1.39)   |
| Cigarette use <sup>c</sup>         |                    |                      |                    |                     |
| None                               | 1                  | 1                    | 1                  | 1                   |
| 1-4 cigarettes/day                 | 0.91 (0.59, 1.39)  | 0.99 (0.36, 2.72)    | 0.99 (0.59, 1.67)  | 0.87 (0.48, 1.58)   |
| ≥5 cigarettes/day                  | 1.29 (0.96, 1.73)  | 1.25 (0.61, 2.55)    | 1.13 (0.79, 1.63)  | 1.51 (1.00, 2.30)   |
| Substance abuse                    |                    |                      |                    |                     |
| No                                 | 1                  | 1                    | 1                  | 1                   |
| Yes                                | 0.87 (0.59, 1.27)  | 1.69 (0.81, 3.51)    | 1.02 (0.66, 1.58)  | 0.89 (0.52, 1.55)   |
| Daily caffeine intake <sup>c</sup> |                    |                      |                    |                     |
| <10 mg                             | 1                  | 1                    | 1                  | 1                   |
| 10-99 mg                           | 0.88 (0.69, 1.13)  | 1.12 (0.60, 2.11)    | 0.86 (0.64, 1.17)  | 0.97 (0.69, 1.38)   |
| 100-199 mg                         | 0.99 (0.77, 1.28)  | 1.07 (0.54, 2.14)    | 0.88 (0.63, 1.22)  | 1.18 (0.82, 1.70)   |
| 200-299 mg                         | 0.99 (0.77, 1.28)  | 1.07 (0.54, 2.14)    | 1.06 (0.72, 1.55)  | 1.08 (0.69, 1.68)   |
| >300 mg                            | 1.13 (0.82, 1.57)  | 1.26 (0.54, 2.94)    | 1.16 (0.78, 1.73)  | 1.08 (0.66, 1.77)   |
| <i>Paternal characteristics</i>    |                    |                      |                    |                     |
| Age at delivery <sup>d</sup>       |                    |                      |                    |                     |
| <25 years                          | 0.78 (0.60, 1.02)  | 1.56 (0.79, 3.11)    | 0.85 (0.61, 1.18)  | 0.86 (0.63, 1.16)   |
| 25-34 years                        | 1                  | 1                    | 1                  | 1                   |
| >35 years                          | 0.80 (0.63, 1.03)  | 1.66 (0.94, 2.94)    | 0.86 (0.63, 1.16)  | 0.94 (0.66, 1.33)   |
| Race/ethnicity <sup>c</sup>        |                    |                      |                    |                     |
| White, non-Hispanic                | 1                  | 1                    | 1                  | 1                   |
| Black, non-Hispanic                | 0.79 (0.42, 1.51)  | 2.31 (0.74, 7.15)    | 0.83 (0.38, 1.82)  | 1.21 (0.54, 2.75)   |
| Hispanic                           | 1.96 (1.40, 2.74)  | 3.26 (1.48, 7.18)    | 1.86 (1.24, 2.79)  | 2.48 (1.52, 4.04)   |
| Other                              | 1.51, (1.00 2.29)  | 0.95 (0.29, 3.13)    | 1.25 (0.75, 2.08)  | 1.79 (0.97, 3.29)   |
| Birthplace <sup>b</sup>            |                    |                      |                    |                     |

|                              |                   |                   |                   |                   |
|------------------------------|-------------------|-------------------|-------------------|-------------------|
| US                           | 1                 | 1                 | 1                 | 1                 |
| non-US                       | 1.91 (1.50, 2.43) | 2.15 (1.18, 3.91) | 1.86 (1.37, 2.52) | 1.98 (1.41, 2.79) |
| Education level <sup>e</sup> |                   |                   |                   |                   |
| <high school                 | 1.16 (0.92, 1.45) | 1.27 (0.72, 2.25) | 1.12 (0.84, 1.48) | 1.26 (0.91, 1.73) |
| high school                  | 1                 | 1                 | 1                 | 1                 |
| >high school                 | 0.86 (0.70, 1.07) | 0.95 (0.56, 1.62) | 0.84 (0.65, 1.09) | 0.92 (0.67, 1.25) |
| Substance abuse              |                   |                   |                   |                   |
| No                           | 1                 | 1                 | 1                 | 1                 |
| Yes                          | 1.03 (0.79, 1.35) | 0.86 (0.41, 1.78) | 1.09 (0.79, 1.50) | 0.92 (0.62, 1.37) |

aOR: adjusted odds ratio, CI: confidence interval, NC: not calculated, OR: odds ratio, US: United States

<sup>a</sup> Multivariable models were adjusted for maternal age.

<sup>b</sup> Multivariable models were adjusted for maternal birthplace.

<sup>c</sup> Multivariable models were adjusted for maternal race/ethnicity.

<sup>d</sup> Multivariable models were adjusted for maternal age and paternal education.

<sup>e</sup> Multivariable models were adjusted for paternal race/ethnicity.
